# Supplementary material for: Translation of dipeptide repeat proteins in C9ORF72 ALS/FTD through unique and redundant AUG initiation codons
Source: eLife journal article supplement (doi:10.7554/elife.83189), 2023-09-07
Supplement: supp [file elife-83189-supp-v1.zip]

A

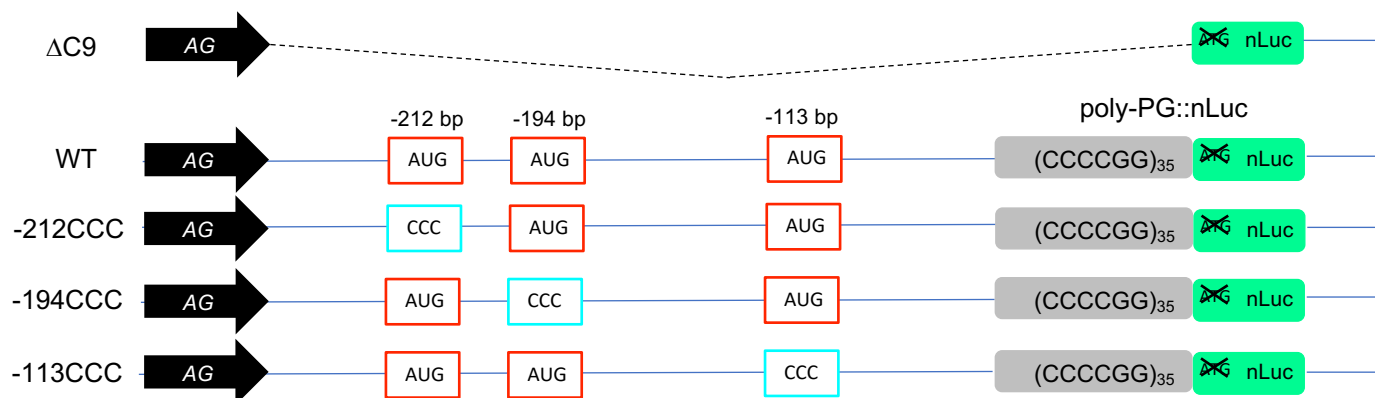

B

HEK293 cells

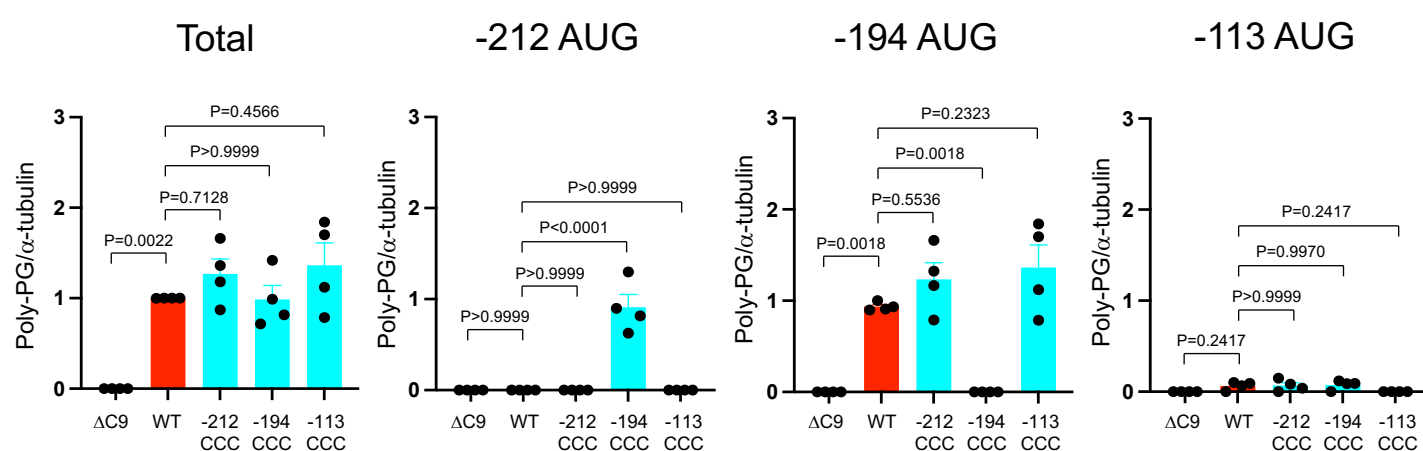

C

NSC34 cells

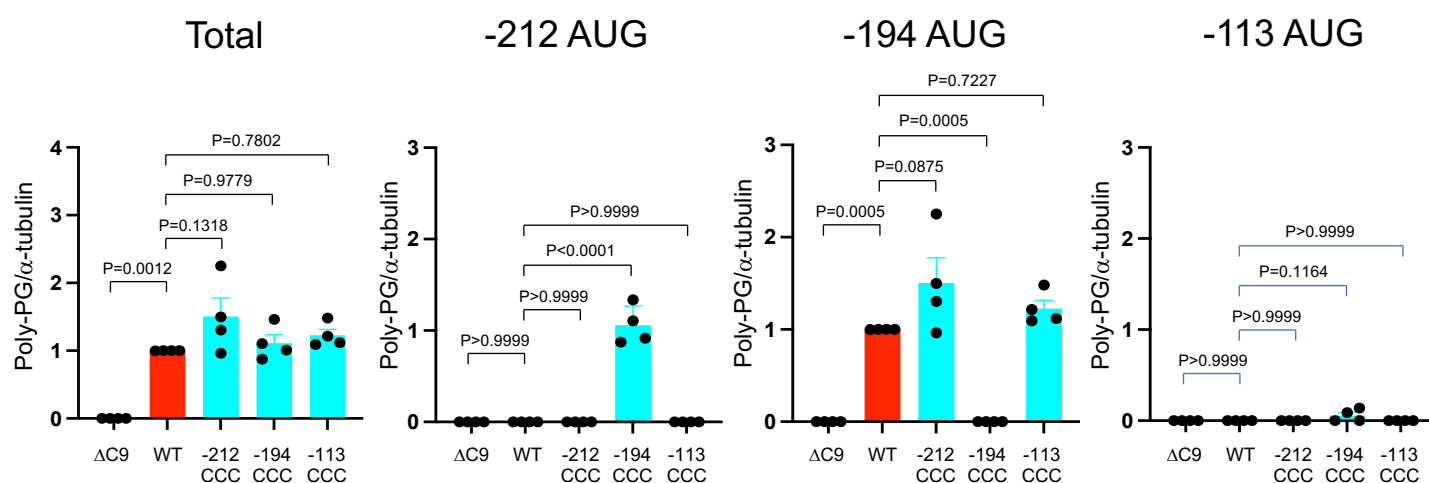

**Figure 4 – figure supplement 1. Quantification of data from Figure 4B.**

(A) Schematic diagram of the constructs. (B-C) The signal intensity of poly-PG and poly-PG translated from each of the AUGs (-212, -194, or -113) in (B) HEK293 and (C) NSC34 cells was quantified. One-way ANOVA with Tukey's multiple comparison test was performed. The experiments were repeated 4 times. Data are presented as mean  $\pm$  s.e.m.
