# Supplementary material for: Translation of dipeptide repeat proteins in C9ORF72 ALS/FTD through unique and redundant AUG initiation codons
Source: eLife journal article supplement (doi:10.7554/elife.83189), 2023-09-07

Figure 1 – figure supplement 2B

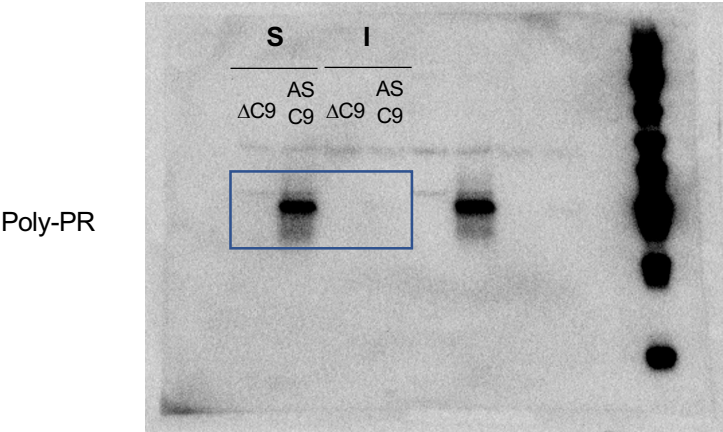

Figure 1 – figure supplement 2C

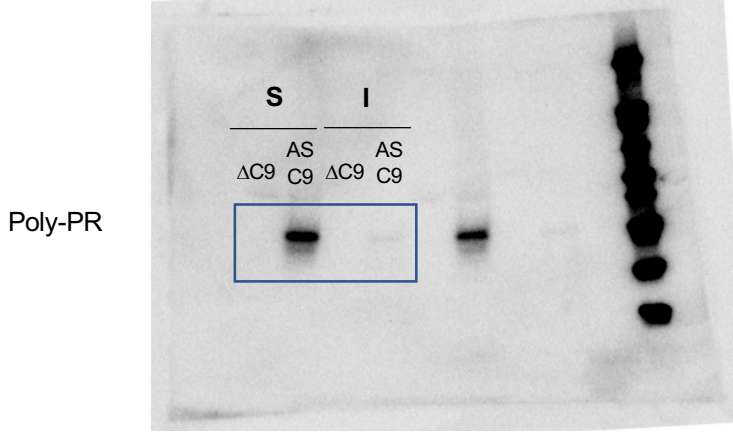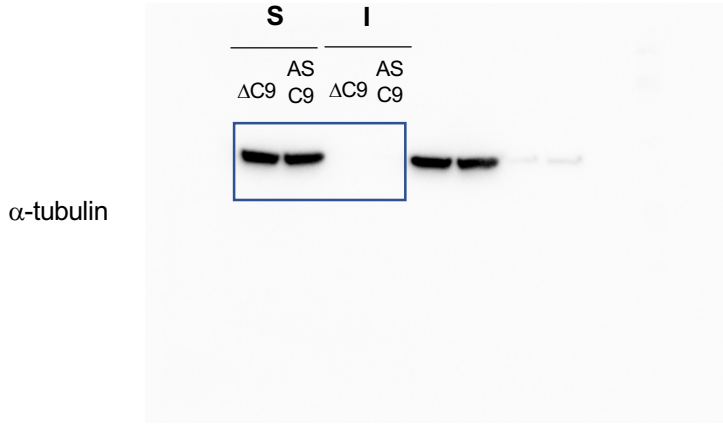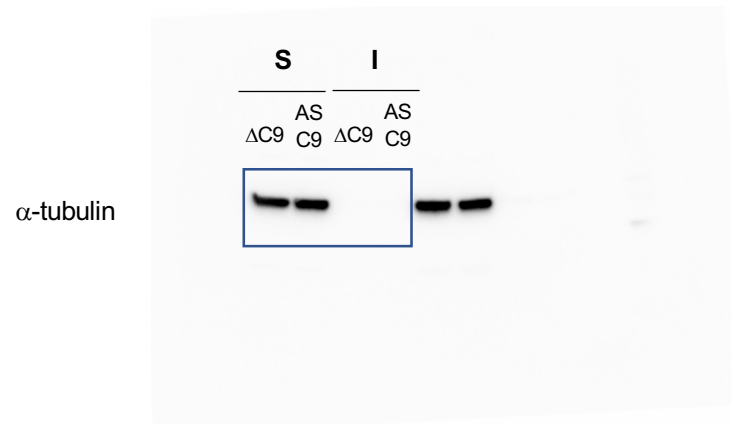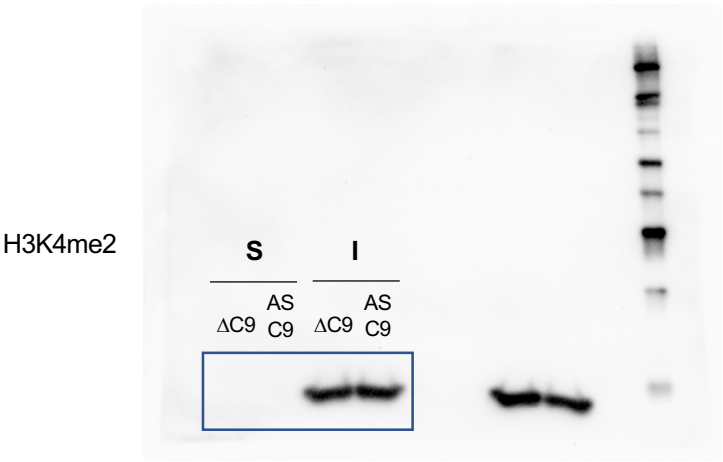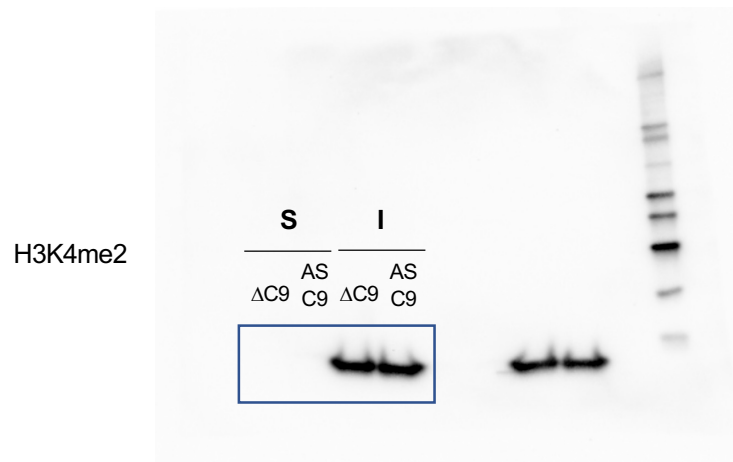

Figure 1 – figure supplement 2F

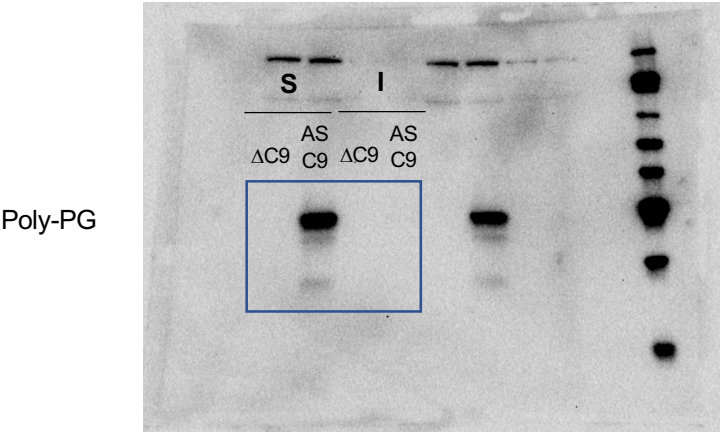

Figure 1 – figure supplement 2G

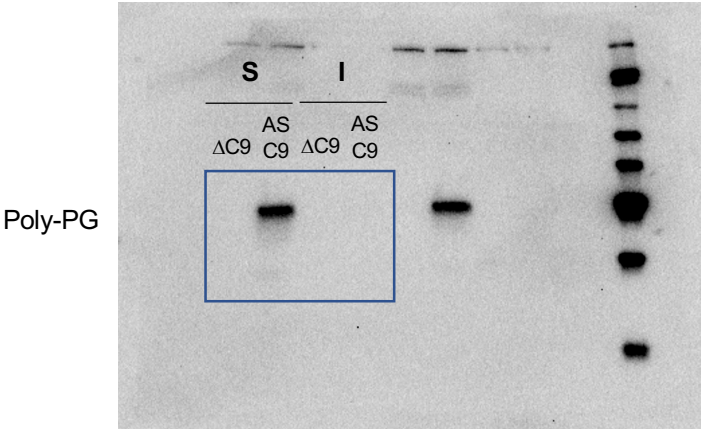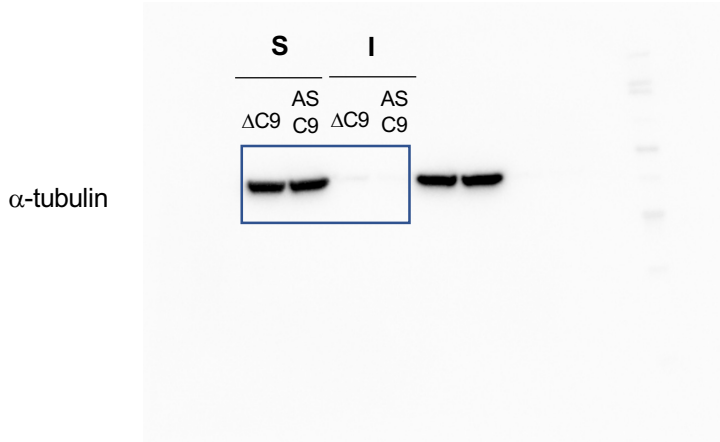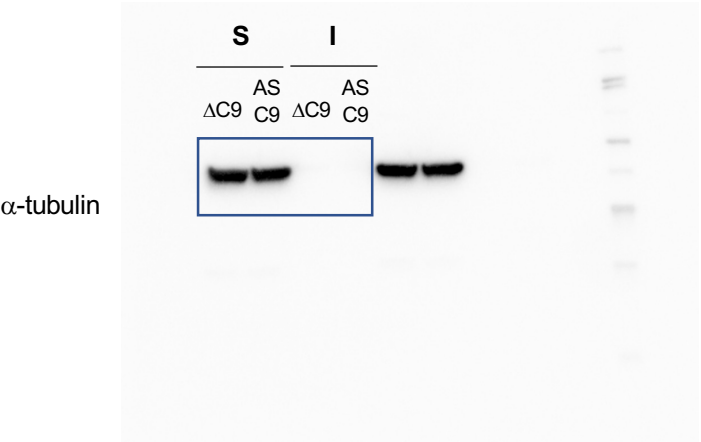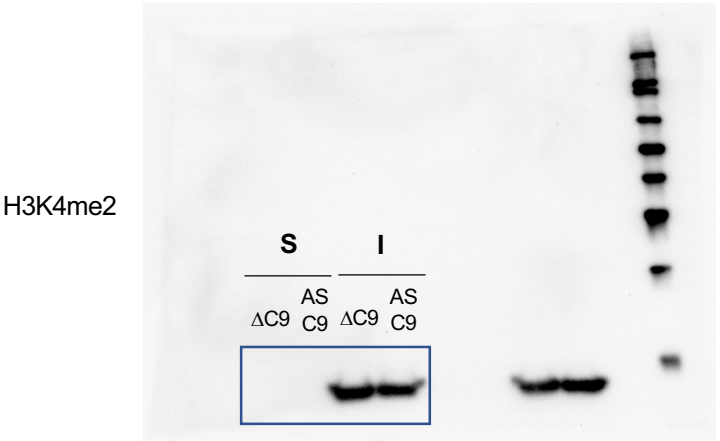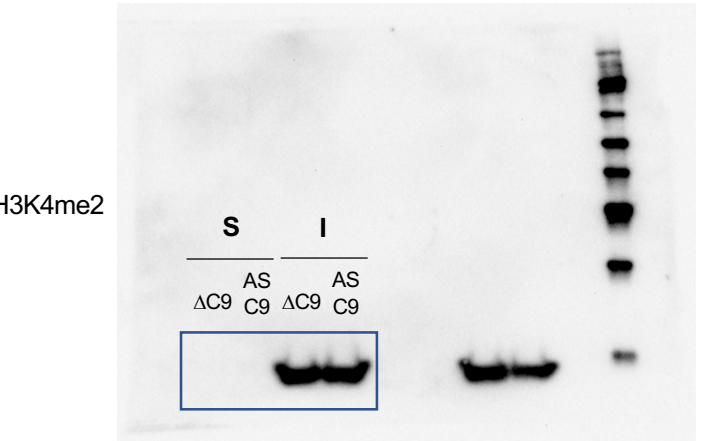

Supplement: supp [file elife-83189-supp-v1.zip]
