# Supplementary material for: Translation of dipeptide repeat proteins in C9ORF72 ALS/FTD through unique and redundant AUG initiation codons
Source: eLife journal article supplement (doi:10.7554/elife.83189), 2023-09-07
Supplement: supp [file elife-83189-supp-v1.zip]

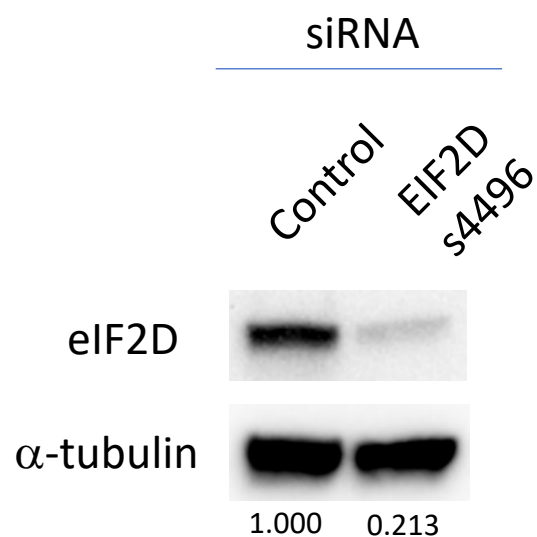

**Figure 7 – figure supplement 1. siRNA (s4496) against eIF2D knocks down eIF2D protein levels.**

3x10<sup>5</sup> HEK293 cells were plated into 6 well cell culture plate. 60 pmol siRNAs were transfected into the cells using 6.25  $\mu$ l Lipofectamine RNAiMAX. 72h later, protein was extracted using RIPA buffer and Western blotting was performed.
