# Supplementary material for: Translation of dipeptide repeat proteins in C9ORF72 ALS/FTD through unique and redundant AUG initiation codons
Source: eLife journal article supplement (doi:10.7554/elife.83189), 2023-09-07
Supplement: supp [file elife-83189-supp-v1.zip]

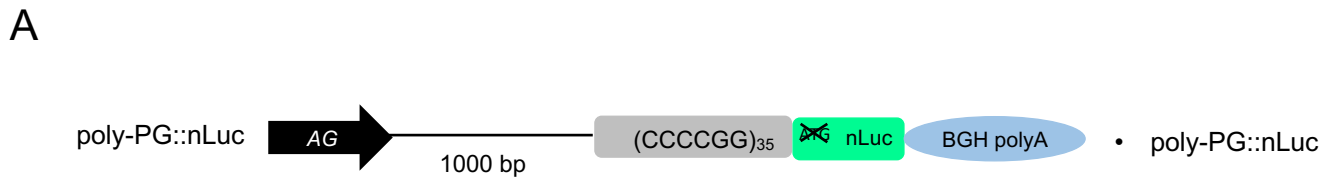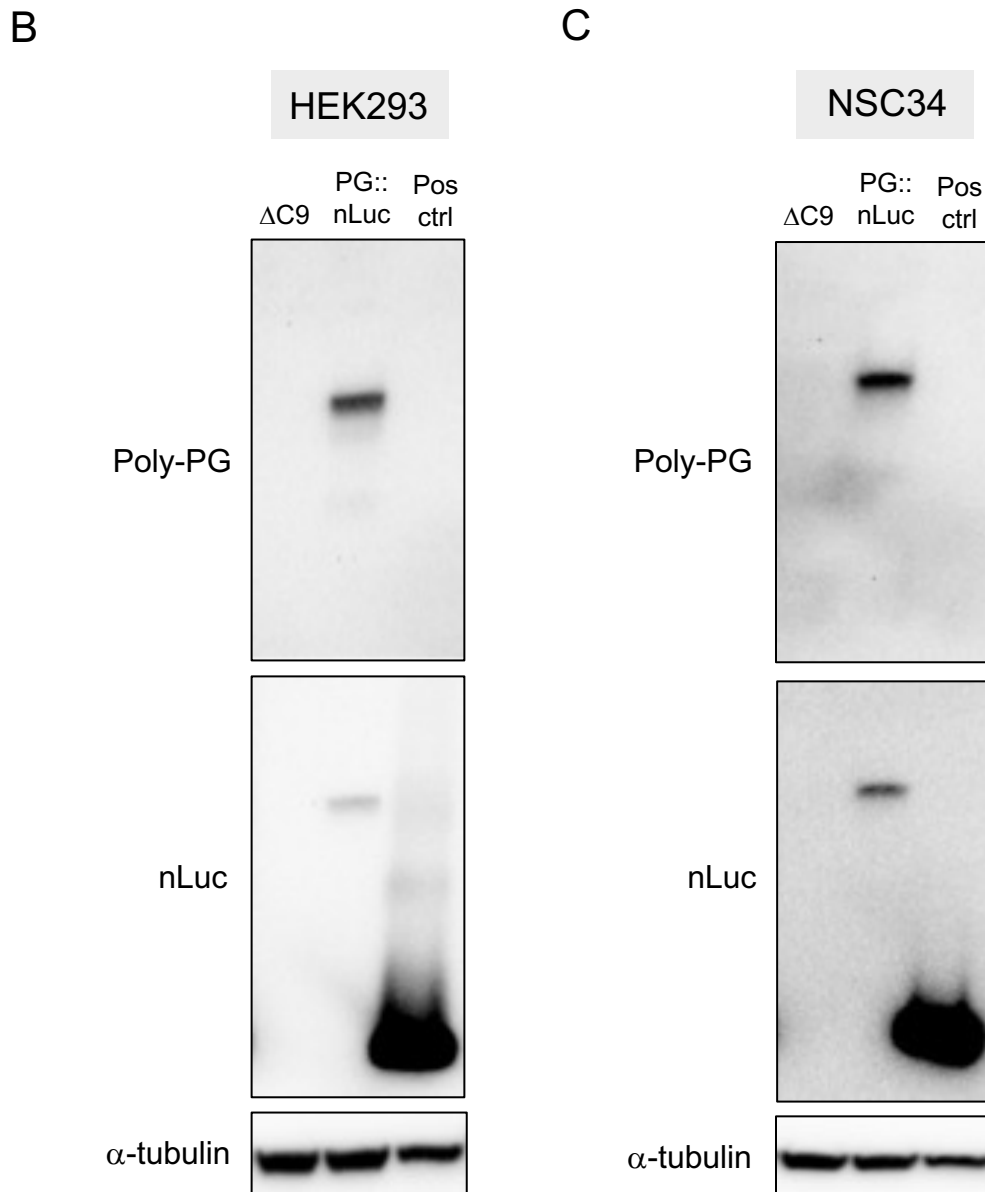

**Figure 1 - figure supplement 1. Nanoluciferase (nLuc) is fused to DPRs translated from anti-sense C9 plasmids containing CCCCCGG repeats.**

(A) Schematic diagram of the construct. (B-C) (B) HEK293 and (C) NSC34 cells were transfected with either ΔC9, PG::nLuc, or positive control (Pos Ctrl) plasmids. The nanoluciferase (nLuc) expression plasmid pNL1.1. [*Nluc*/CMV] from Promega was used as positive control. Cell lysates were processed for Western blotting, and immunostained with antibodies to poly-PG, nLuc, and α-tubulin.
