# Supplementary material for: Translation of dipeptide repeat proteins in C9ORF72 ALS/FTD through unique and redundant AUG initiation codons
Source: eLife journal article supplement (doi:10.7554/elife.83189), 2023-09-07
Supplement: supp [file elife-83189-supp-v1.zip]

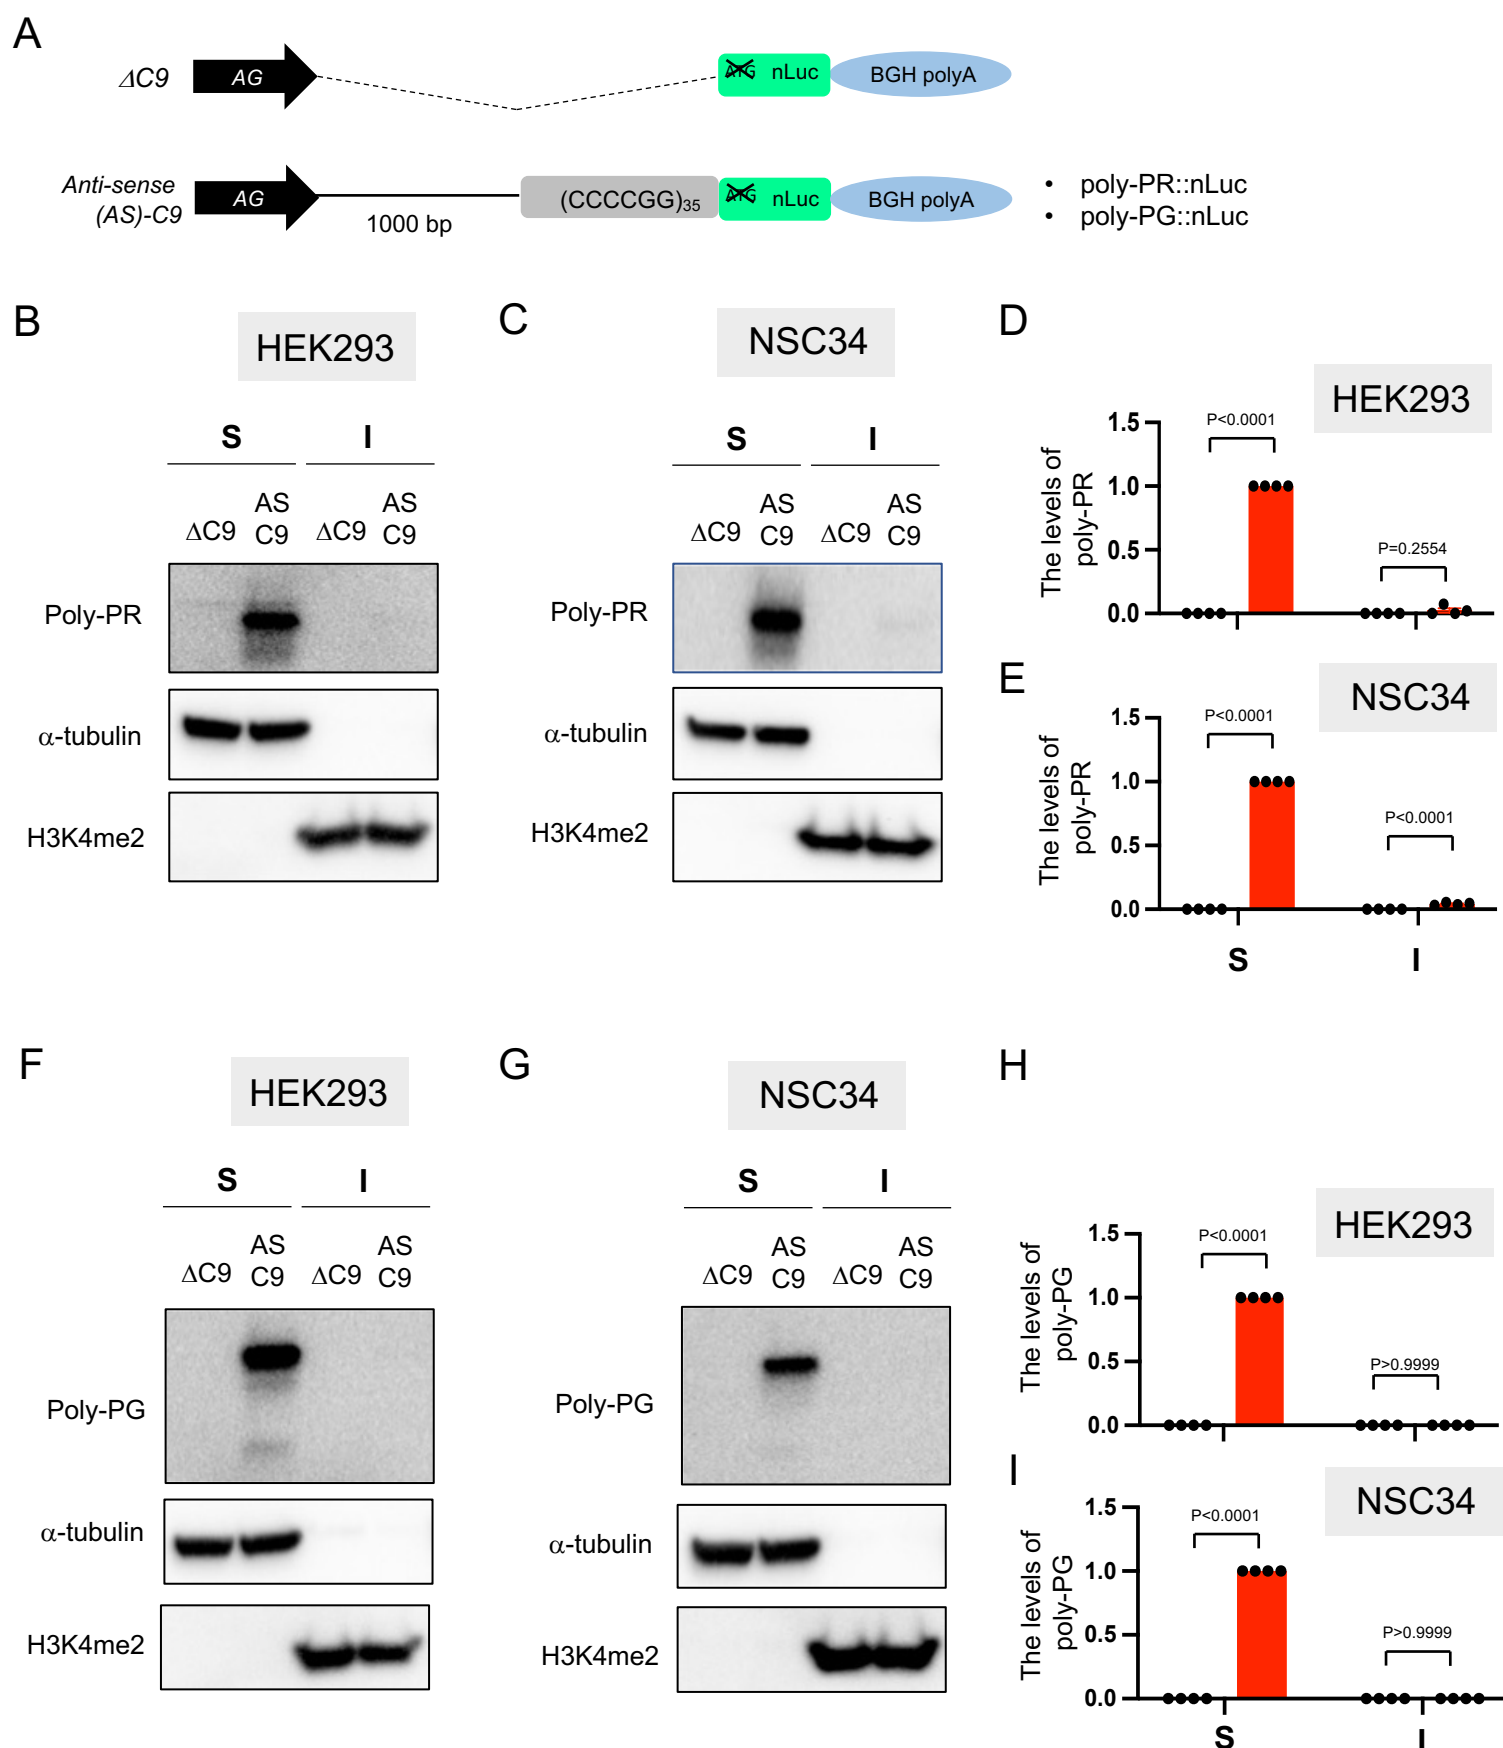

**Figure 1 - figure supplement 2. Expression levels of poly-PR and poly-PG in the RIPA-insoluble fraction.**

(A) Schematic diagram of the constructs. (B, D, F, H) HEK293 and (C, E, G, I) NSC34 cells were transfected with either  $\Delta$ C9 (blue) or AS-C9 (red) plasmids. Cell lysates were fractionated into RIPA-soluble (S) and -insoluble (I) fraction. Western blotting was performed and immunostained with antibodies to poly-PR (B-C), poly-PG (F-G),  $\alpha$ -tubulin, and H3K4me2. H3K4me2 is a reliable marker for the RIPA-insoluble fraction (see Materials and Methods). (D-E, H-I) The signal intensity of the bands was quantified. The expression levels of poly-PR (D-E) or poly-PG (H-I) in AS-C9 of RIPA-soluble fraction were set to 1.0. Experiments were repeated 4 times. Two-way ANOVA with Tukey's multiple comparison test was performed.
