# Supplementary material for: Translation of dipeptide repeat proteins in C9ORF72 ALS/FTD through unique and redundant AUG initiation codons
Source: eLife. 2023 Sep 7;12:e83189. doi: 10.7554/eLife.83189 (PMC10541178; doi:10.7554/eLife.83189)
Supplement: Supplementary file 1. [file elife-83189-supp1.xlsx]

## Sheet: Sheet1
Supplementary file 1. List of primers used in this study.
Name	Sequence
Oligonucleotide I -F	AGCTTAGTACTCGCTGAGGGTGAACAAGAAAAGACCTGATAAAGATTAACCAGAAGAAA ACAAGGAGGGAAACAACCGCAGCCTGTAGCAAGCT CTGGAACTCAGGAGTCGCGCGCTAGGGGCCGGGGCCGGGGCC
Oligonucleotide I -R	CCGGCCCCGGCCCCTAGCGCGCGACTCCTGAGTTCCAGAGCTTGCTACAGGCTGCGGTTGTTTCCCTCCTTGTTTTCTTCTGGTTAATCTTTATC AGGTCTTTTCTTGTTCACCCTCA GCGAGTACTA
Oligonucleotide II -F	GGGGCCGGGGCCGGGGCCGGGGCCGGGGCCGGGGCCGGGGCCGGGGCCGGGGCCGGGGCCCAAGGAAAGC
Oligonucleotide II -R	GGCCGCTTTCCTTGGGCCCCGGCCCCGGCCCCGGCCCCGGCCCCGGCCCCGGCCCCGGCCCCGGCCCCGGCCCCGGCC
Oligonucleotide III -F	GGGGCCGGGGCCGGGGCGTGGTCGGGGCGGGCCCGGGGGCGGGCCCGGGGCGGGGCTGCGGTTGCGGTGCCTGCGCCCGCGGCGGCGGA GGCGCAGGCGGTGGCGAGTGGGGGATCAAACGC
Oligonucleotide III -R	GGCCGCGTTTGATCCCCCACTCGCCACCGCCTGCGCCTCCGCCGCCGCGGGCGCAGGCACCGCAACCGCAGCCCCGCCCCGGGCCCGCCC CCGGGCCCGCCCCGACCACGCCCCGGCCCCGGCCCCGGCC
Oligonucleotide IV -F	GGCCGCAGGAGTCGCGCGG
Oligonucleotide IV -R	TACCGCGCGACTCCTGC
543bp-F	CCCAAACCGCGGCGGCGGAGGCGCAGGCGGTG
543bp-R	AAACCCTCTAGAAGCTTGGGCTGAAATTGTGC
392bp-F	AAACCCAAGCTTGTTGTGAACAACTGGTGCAT
392bp-R	AAACCCTCTAGAGAGTGGTGATGACTTGCATA
560bp-F	AAACCCAAGCTTGGGCTGAAATTGTGCAGGCG
560bp-R	AAACCCGGATCCGCTGCGGTTGCGGTGCCTGC
-366CCC-F	AGCTCGGGTACCCAGGGCGGGAA
-366CCC-R	GTCTCCTTCCCGGGGACC
-366UAG-F	AGCTCGGGTATAGAGGGCGGGAAAGC
-366UAG-R	GTCTCCTTCCCGGGGACC
-273CCC-F	CGGGGCCCGGCCCCAGGCAATTCCACCAGTCGC
-273CCC-R	GGCTTCCCGGCGGCGGCG
-273UAG-F	CGGGGCCCGGTAGCAGGCAATTCCACCAGTCG
-273UAG-R	GGCTTCCCGGCGGCGGCG
-212CCC-F	GGTCAGAGAACCCAGAGGGAAAGTAAAAATGCGTCGAG
-212CCC-R	GAAGCTGGGTGTCGGGCT
-194CCC-F	GAAAGTAAAACCCCGTCGAGCTCTGAGG
-194CCC-R	CCTCTCATTTCTCTGACC
-113CCC-F	ACCCGCCAGGCCCCCGCCTCCTC
-113CCC-R	GGCTGTTTGGGGTTCGGC
-212CCC-194CCC-182CCC-F	ACCCCGTCGAGCTCCCAGGAGAGCCCCCGCTTCT
-212CCC-194CCC-182CCC-R	TTTACTTTCCCTCTGGGTTCTCTGACCGAAGCTGGG
-194CCC-182CCC-F	AGCTCCCAGGAGAGCCCCCGCTTCT
-194CCC-182CCC-R	CGACGGGGTTTTACTTTCCCTCTCATTTCTCTGACCG
-212CCC-182CCC-F	AATGCGTCGAGCTCCCAGGAGAGCCCCCGCTTCT
-212CCC-182CCC-R	TTTACTTTCCCTCTGGGTTCTCTGACCGAAGCTGGG
-212CCC-194CCC-F	AGTAAAACCCCGTCGAGCTCTGAGGAGA
-212CCC-194CCC-R	TTCCCTCTGGGTTCTCTGACCGAAGCTGG
-194CCC-182CCC-F	AGCTCCCAGGAGAGCCCCCGCTTCT
-194CCC-182CCC-R	CGACGGGGTTTTACTTTCCCTCTGGGTTCTCTGAC
-212UAG-F	GGTCAGAGAATAGAGAGGGAAAGTAAAAATGCGTCG
-212UAG-R	GAAGCTGGGTGTCGGGCT
-194UAG-F	GAAAGTAAAATAGCGTCGAGCTC
-194UAG-R	CCTCTCATTTCTCTGACC
-113UAG-F	ACCCGCCAGGTAGCCGCCTCCTC
-113UAG-R	GGCTGTTTGGGGTTCGGC
385bp-F	AAACCCTCTAGAAGCTTGGGCTGAAATTGTGC
385bp-R	CCCAAACCGCGGCGGCGGAGGCGCAGGCGGTG
AUG-PA-F	AGCTTGAGACCCAACCATGGC
AUG-PA-R	CGCGGCCATGGTTGGGTCTCA
