# Supplementary figures and images for: Translation of dipeptide repeat proteins in C9ORF72 ALS/FTD through unique and redundant AUG initiation codons
Source: eLife journal article supplement (doi:10.7554/elife.83189), 2023-09-07

Figure 2B

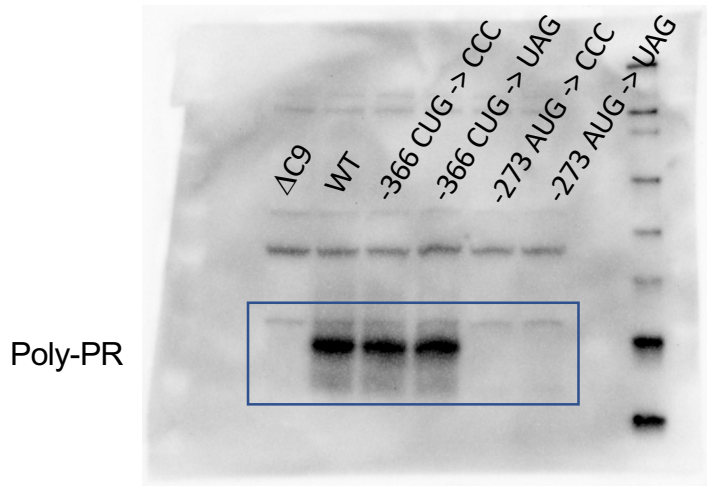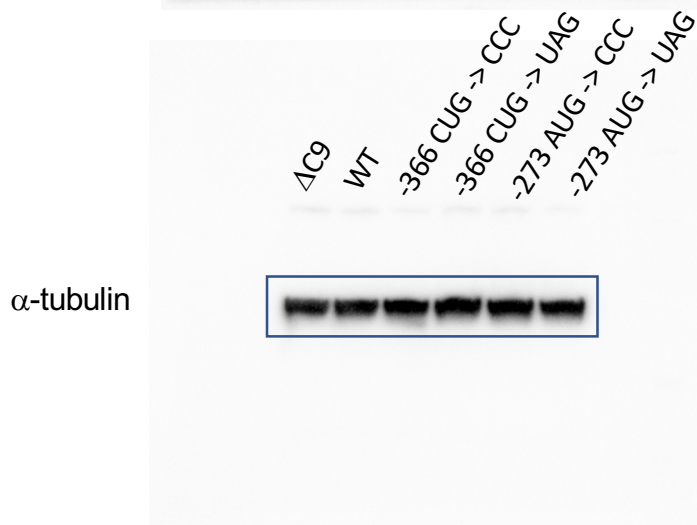

Figure 2D

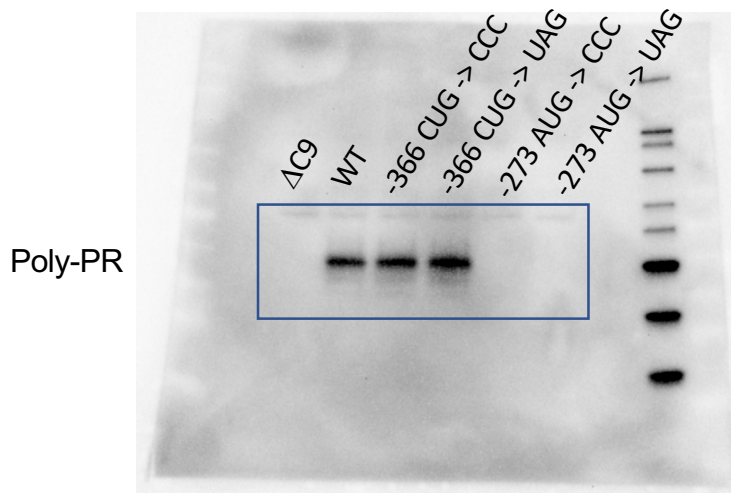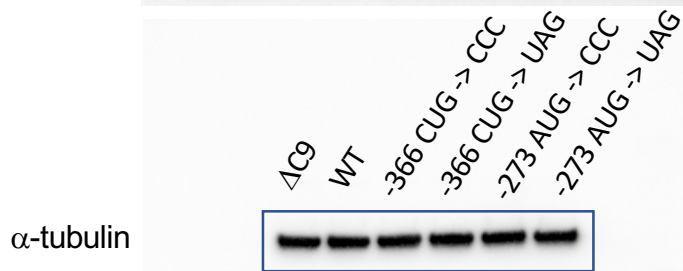

Supplement: supp [file elife-83189-supp-v1.zip]

Figure 3B, HEK293 cells

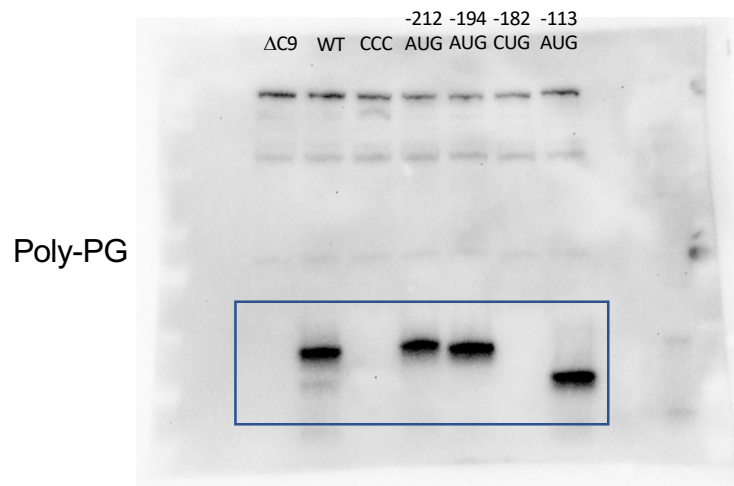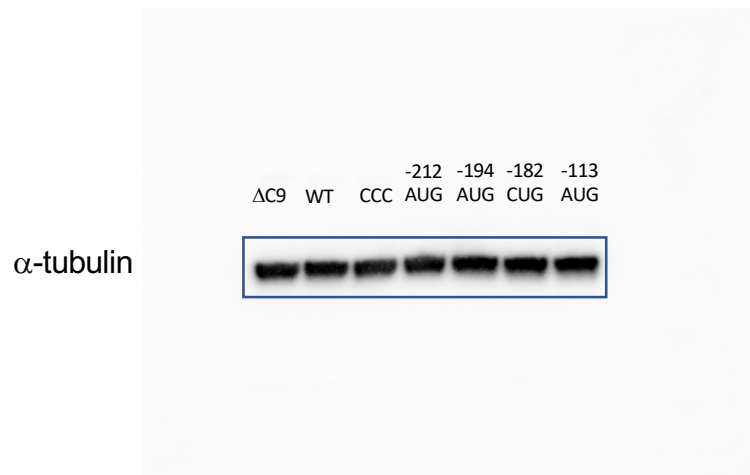

Figure 3B, NSC34 cells

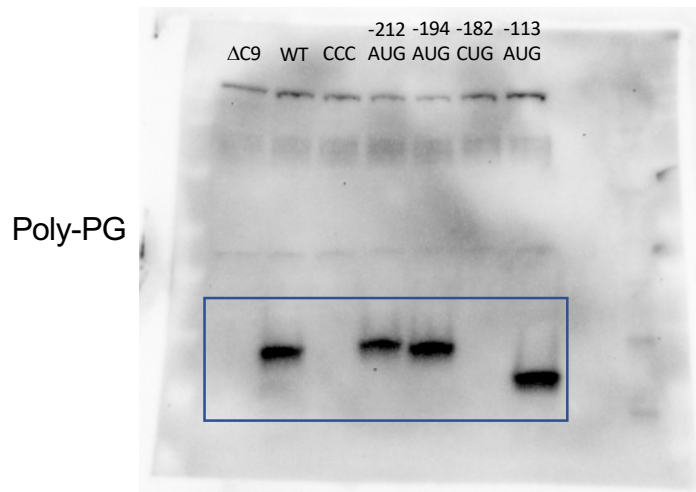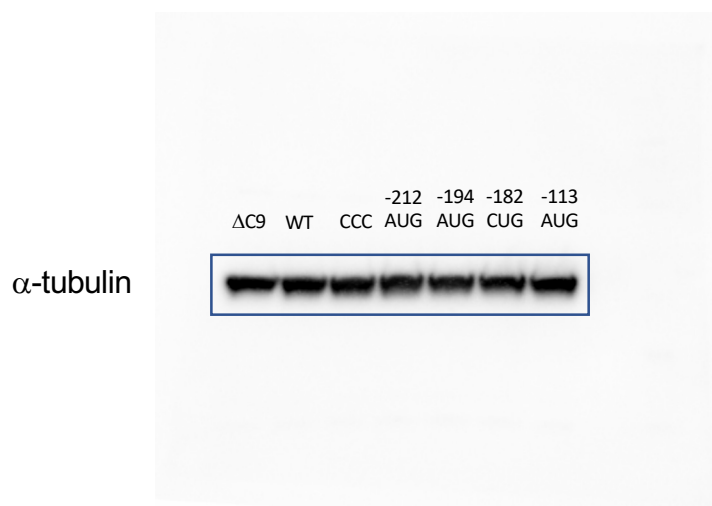

Supplement: supp [file elife-83189-supp-v1.zip]

Figure 4B, HEK293 cells

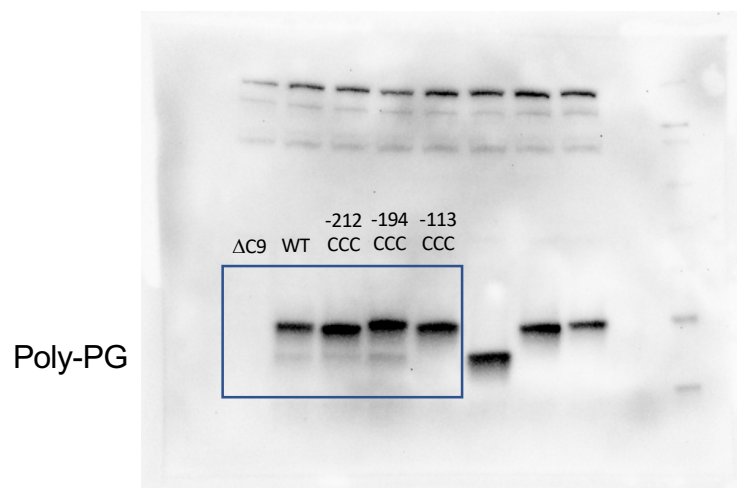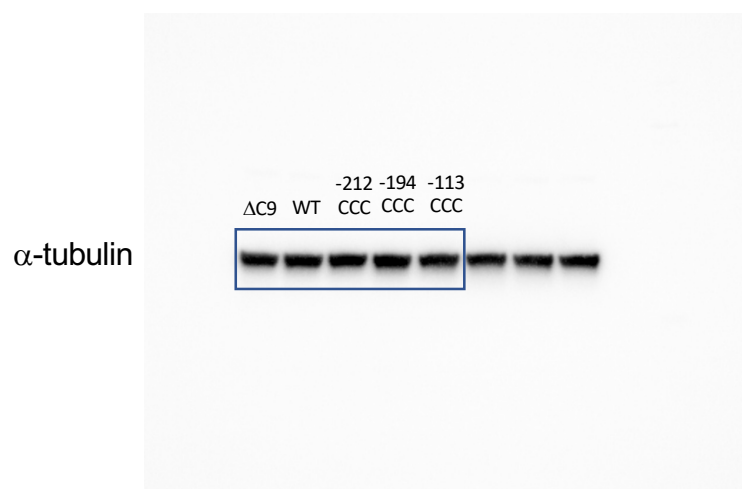

Figure 4B, NSC34 cells

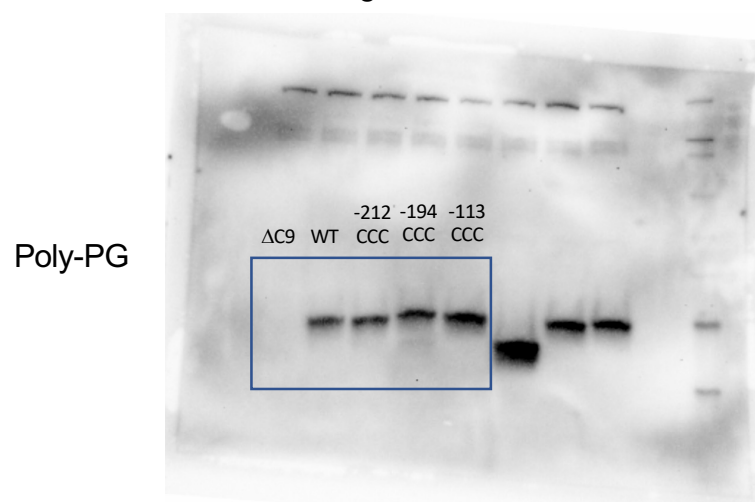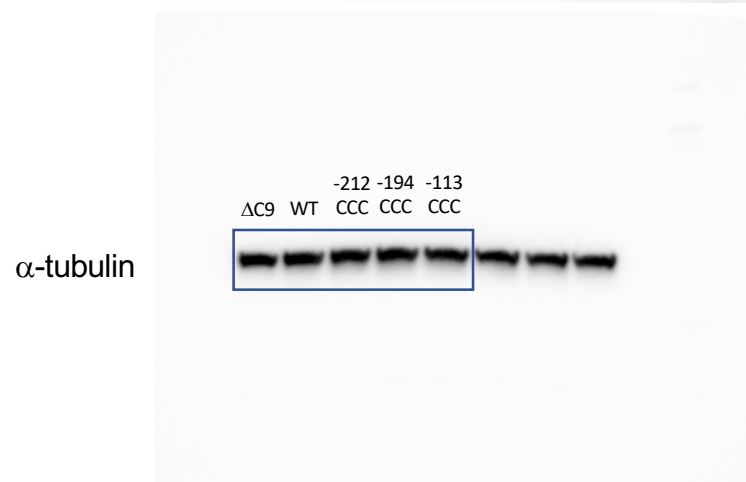

Supplement: supp [file elife-83189-supp-v1.zip]

Figure 1 – figure supplement 1B

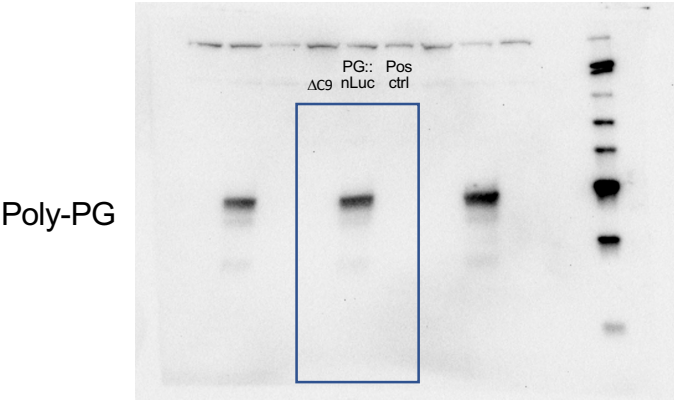

Figure 1 – figure supplement 1C

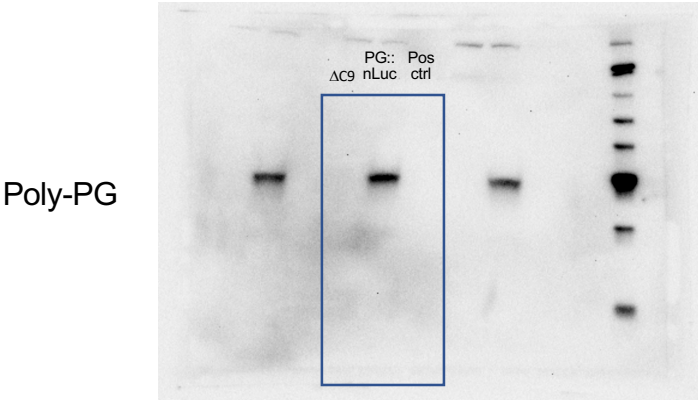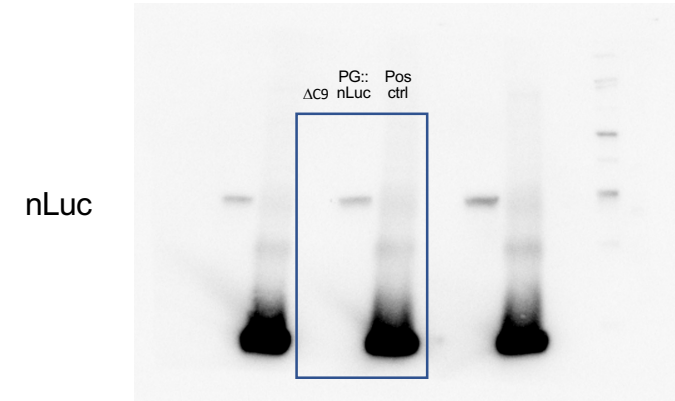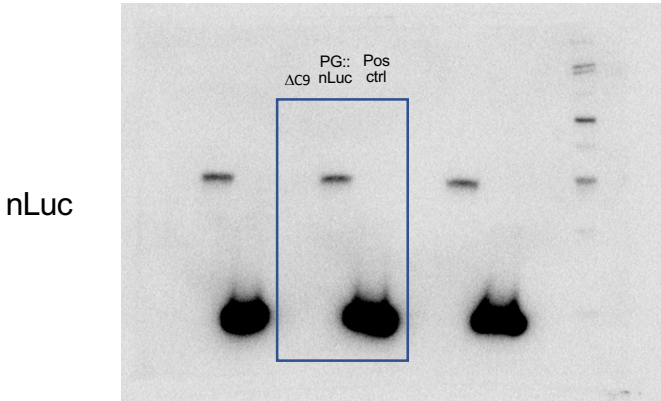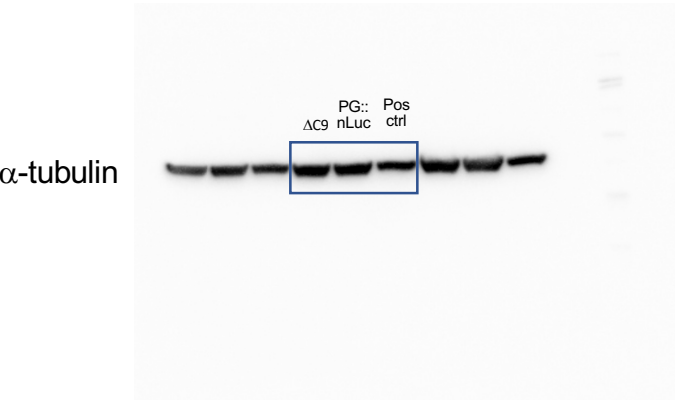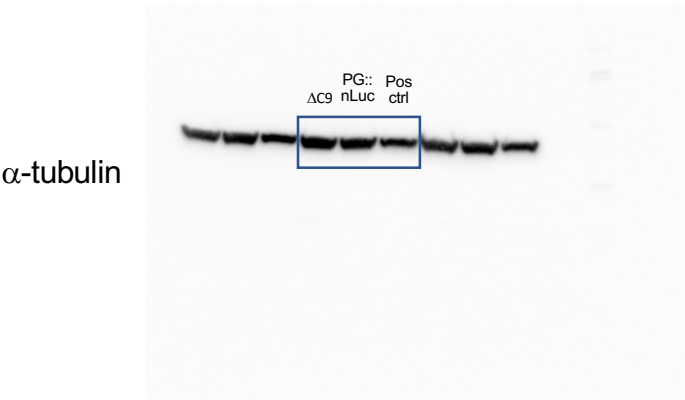

Supplement: supp [file elife-83189-supp-v1.zip]

Figure 7 – figure supplement 1

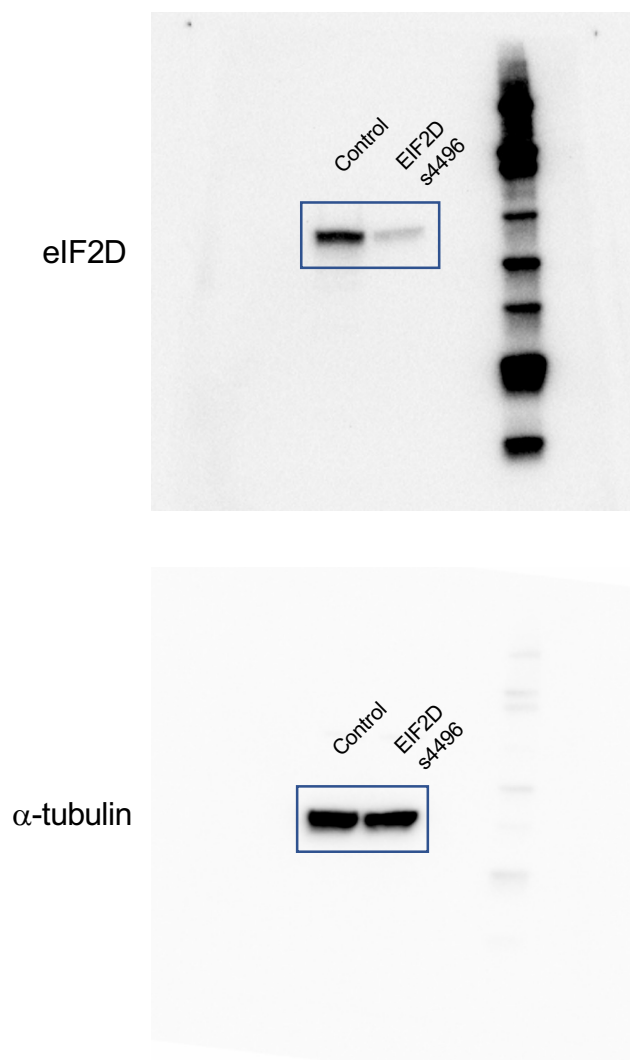

Supplement: supp [file elife-83189-supp-v1.zip]

Figure 6C

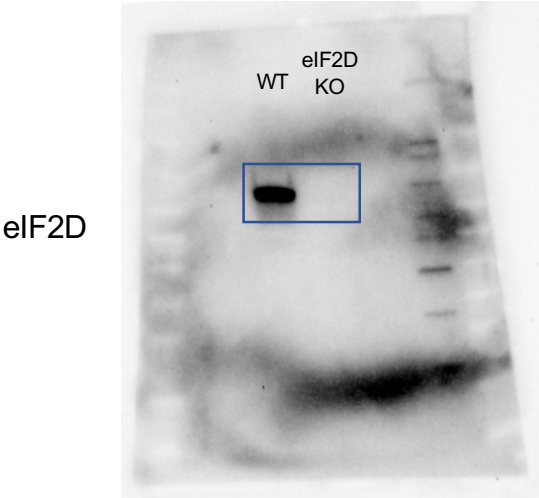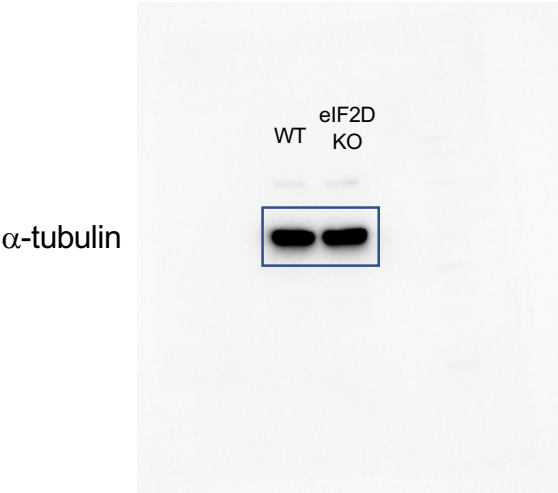

Supplement: supp [file elife-83189-supp-v1.zip]

Figure 5B, HEK293 cells

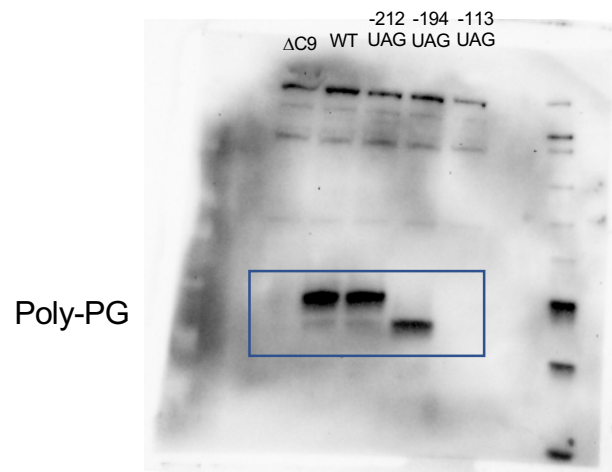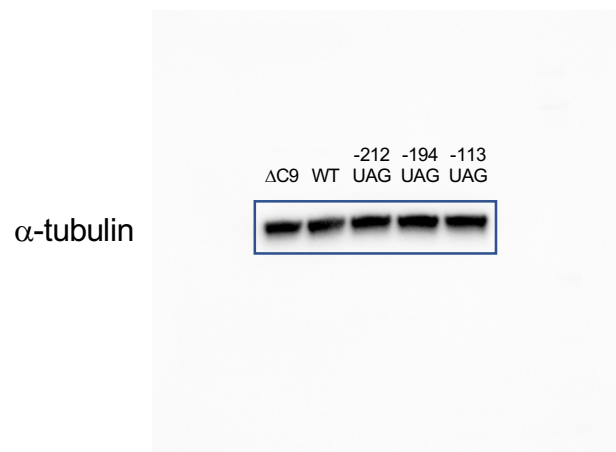

Figure 5B, NSC34 cells

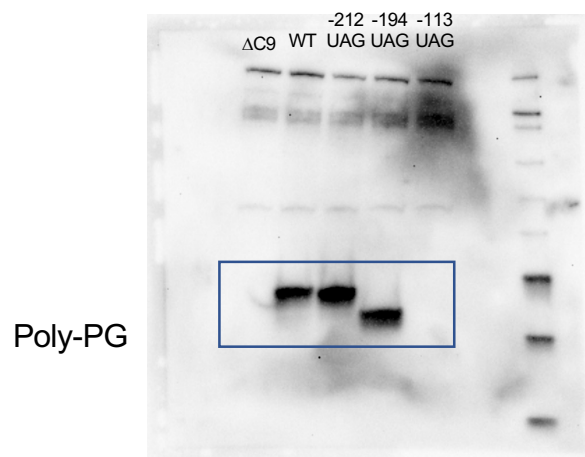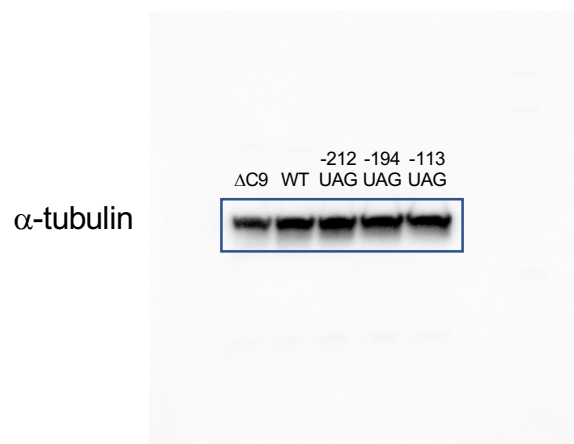

Supplement: supp [file elife-83189-supp-v1.zip]

Figure 1D, HEK293

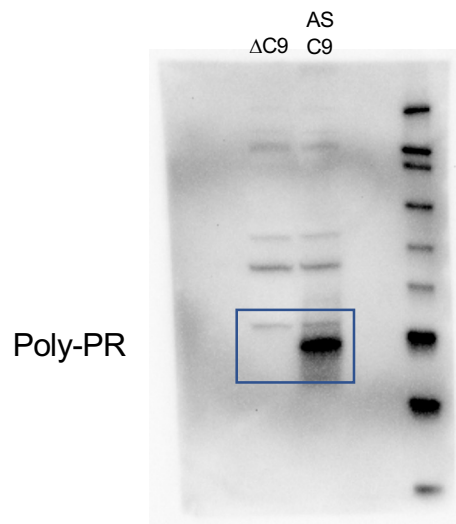

Figure 1E, HEK293

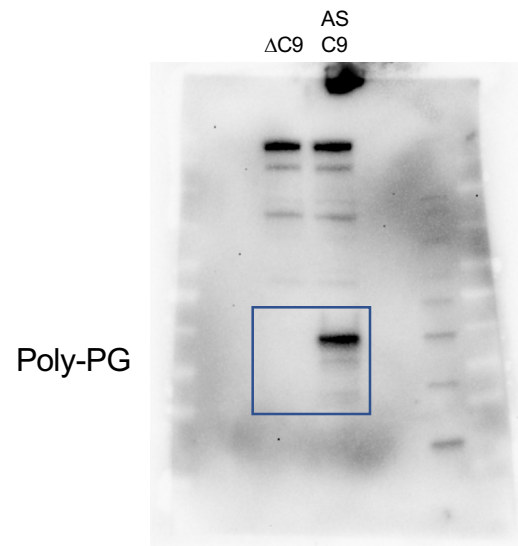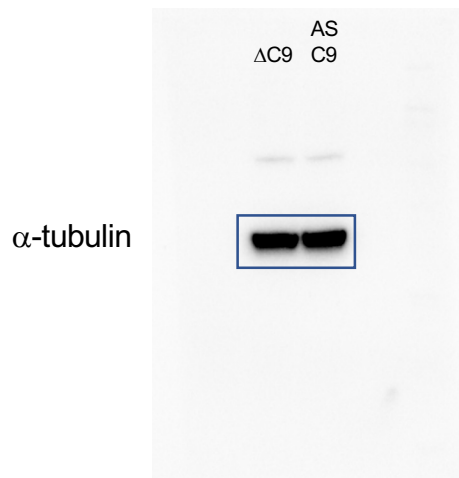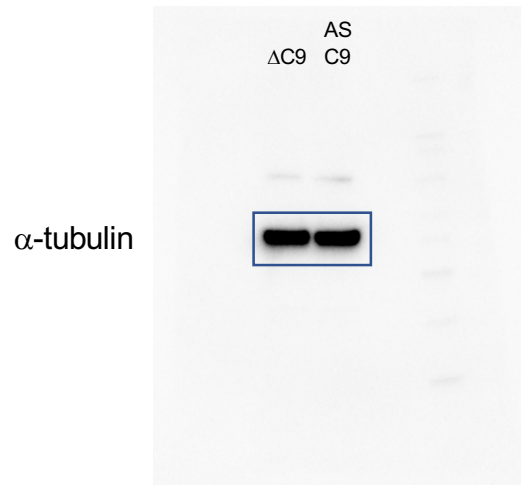

Figure 1D, NSC34

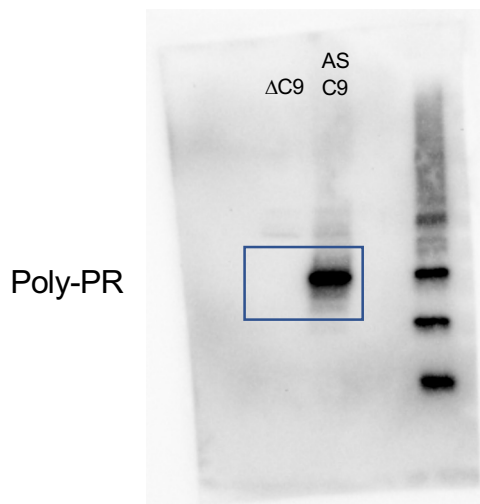

Figure 1E, NSC34

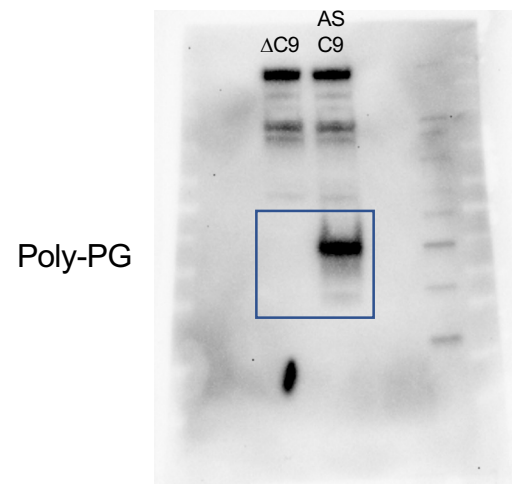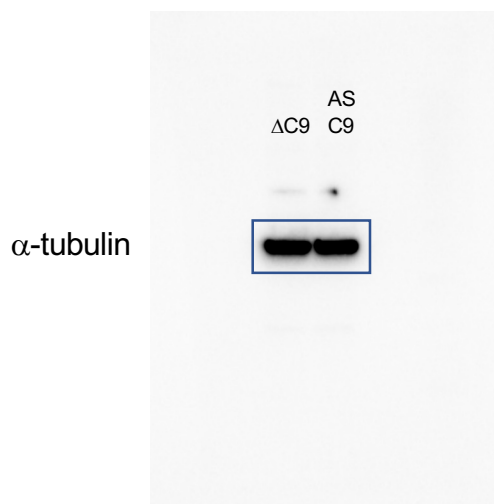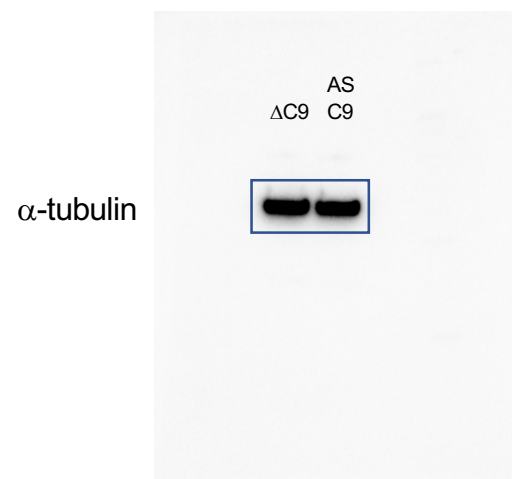

Supplement: supp [file elife-83189-supp-v1.zip]
